# Supplementary material for: Enhanced oil-fouling resistance of poly(ether sulfone) membranes by incorporation of novel amphiphilic zwitterionic copolymers
Source: Royal Society of Chemistry journal article supplement (doi:10.1039/c5ra23544h), 2016-01-01
Supplement: c5ra23544h1.pdf [file c5ra23544h1.pdf]

**Enhanced oil-fouling resistance of poly(ether sulfone) membrane by  
incorporating novel amphiphilic zwitterionic copolymers**

**Guangfa Zhang, Fan Gao, Qinghua Zhang\*, Xiaoli Zhan, Fengqiu Chen**

College of Chemical and Biological Engineering, Zhejiang University, Hangzhou310027, PR  
China

**Corresponding author: Qinghua Zhang\***

E-mail address: qhzhang@zju.edu.cn

Tel: +86-571-8795-3382; Fax: +86-571-8795-1227

**Table S1** The zwitterionic conversions of amphiphilic copolymer precursor.

| Samples | Conversion (%) |
|---------|----------------|
| P1      | 88.2           |
| P2      | 79.3           |
| P3      | 80.1           |

**Table S2** Porosity of the control and modified PES membranes.

| Membranes | Porosity (%) |
|-----------|--------------|
| PES       | 75.6 ± 0.8   |
| PES/P0    | 74.0 ± 0.7   |
| PES/P1    | 79.7 ± 1.0   |
| PES/P2    | 74.9 ± 0.8   |
| PES/P3    | 73.4 ± 0.6   |

**Table S3** The static contact angles of PES and PES blend membranes.

| Membranes | Water (deg) | Glycerol (deg) | HD (deg) <sup>a</sup> | GS-1 (deg) |
|-----------|-------------|----------------|-----------------------|------------|
| PES       | 81.7 ± 1.8  | 69.7 ± 1.6     | 8.4 ± 0.9             | 29.5 ± 1.3 |
| PES/P0    | 72.1 ± 1.7  | 62.4 ± 1.6     | 8.1 ± 0.8             | 28.5 ± 1.3 |
| PES/P1    | 86.8 ± 1.8  | 78.8 ± 1.7     | 14.1 ± 1.2            | 35.6 ± 1.4 |
| PES/P2    | 88.1 ± 1.6  | 82.0 ± 1.6     | 19.4 ± 1.1            | 38.6 ± 1.2 |
| PES/P3    | 93.4 ± 1.9  | 92.2 ± 1.8     | 45.5 ± 1.3            | 72.0 ± 1.5 |

<sup>a</sup> HD refers to Hexadecane.

**Table S4** The pure water flux ( $J_{w1}$ ), total flux-decline ratio ( $DR_t$ ), reversible flux-decline ratio ( $DR_r$ ), irreversible flux-decline ratio ( $DR_{ir}$ ), flux recovery ratio ( $FRR$ ), and retention of oil for the as-prepared membranes in oil/water emulsion filtration experiments.

| Membranes | $J_{w1}$<br>(L/(m <sup>2</sup> h)) | $J_p$<br>(L/(m <sup>2</sup> h)) | $J_{w2}$<br>(L/(m <sup>2</sup> h)) | $DR_t$<br>(%) | $DR_r$<br>(%) | $DR_{ir}$<br>(%) | $FRR$<br>(%) | Retention<br>(%) |
|-----------|------------------------------------|---------------------------------|------------------------------------|---------------|---------------|------------------|--------------|------------------|
| PES       | 128.1                              | 64.3                            | 95.4                               | 49.8          | 24.3          | 25.5             | 74.5         | 99.8             |
| PES/P0    | 149.7                              | 68.0                            | 125.3                              | 54.6          | 38.3          | 16.3             | 83.7         | 99.5             |
| PES/P1    | 144.5                              | 84.8                            | 125.6                              | 41.3          | 28.2          | 13.1             | 86.9         | 99.4             |
| PES/P2    | 117.5                              | 81.3                            | 110.7                              | 30.8          | 25.0          | 5.8              | 94.2         | 99.6             |
| PES/P3    | 102.9                              | 85.0                            | 102.2                              | 17.4          | 16.7          | 0.7              | 99.3         | 99.9             |

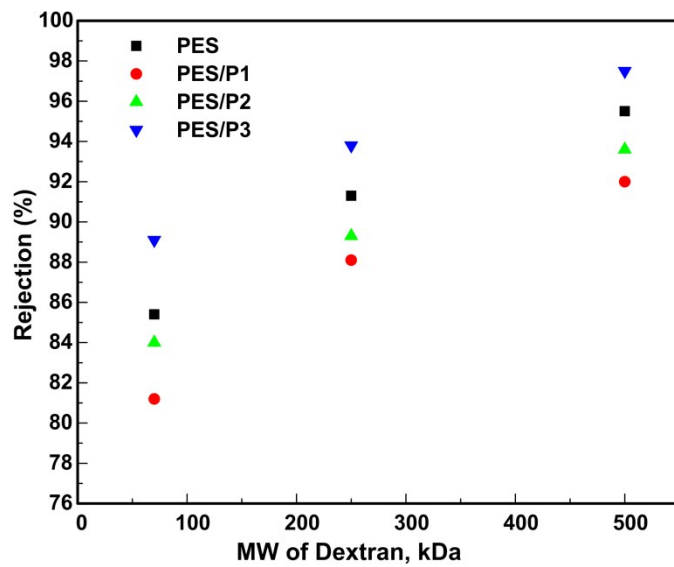

Fig. S1. Molecular weights cut-off for control PES and modified membranes.
